# Supplementary material for: In situ synthesis of flexible elastic N-doped carbon foam as a carbon current collector and interlayer for high-performance lithium sulfur batteries
Source: Royal Society of Chemistry journal article supplement (doi:10.1039/c6ta01855f), 2016-01-01
Supplement: c6ta01855f1.pdf [file c6ta01855f1.pdf]

## Supporting Information

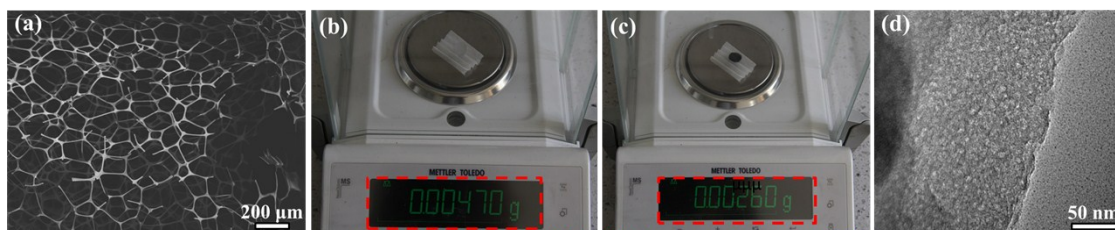

Fig. S1: (a) SEM of PUF. (b) the quality of Al current collector and (c) NCF current collector. (d) TEM of NCF.

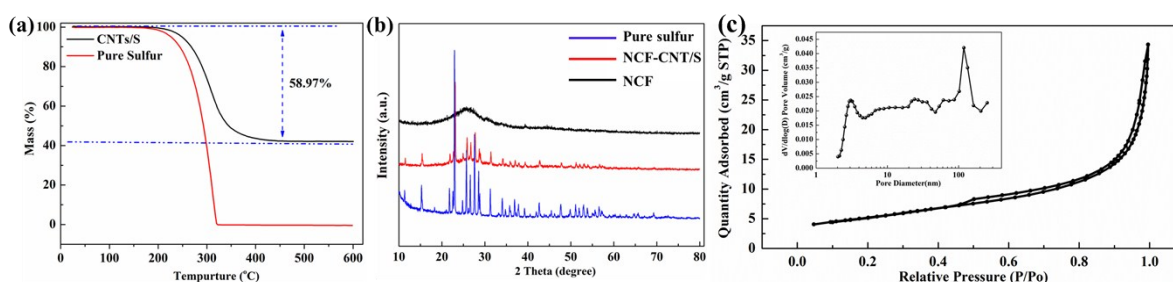

Fig. S2: (a) TG of CNT/S composites and pure sulfur. (b) XRD of pure sulfur, NCF and NCF-CNT/S cathode. (c) N<sub>2</sub> adsorption-desorption isotherms of NCF-CNT/S (the inset of pore diameter distribution curves).

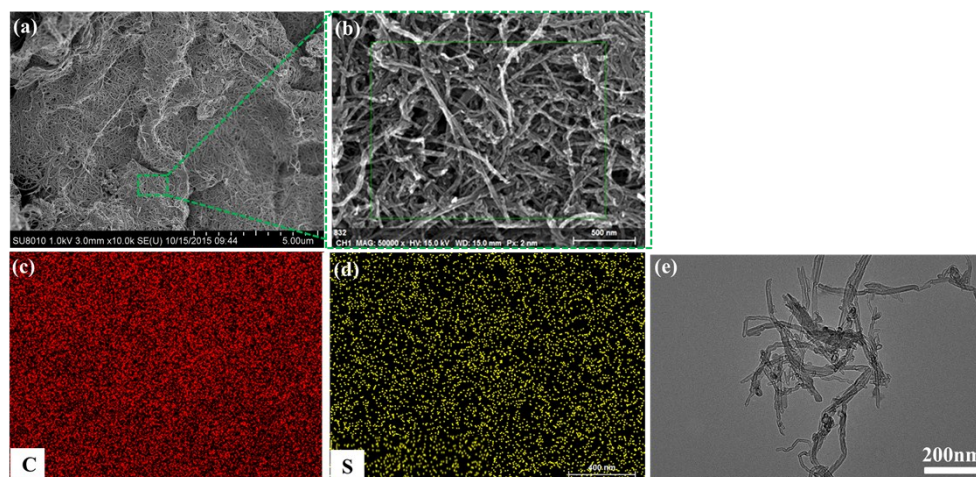

Fig. S3 (a) FESEM of CNT/S composites. (b) FESEM of the selection area. (c)-(d) EDS of CNT/S composites. (e) TEM images of CNT/S composites.

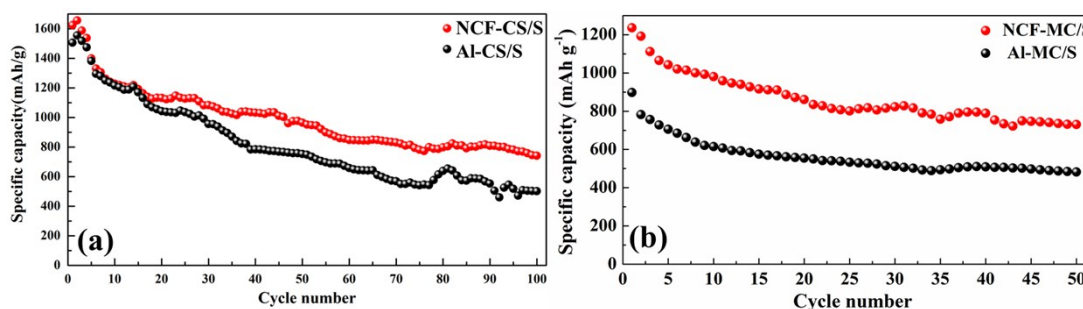

Fig. S4: Cycle performance of (a) the NCF-CS/S cathodes and Al-CS/S. (b) NCF-MC/S cathode and Al-MC/S

The carbon hollow spheres (CS) were prepared as previously reported.<sup>1</sup> Briefly, first, 0.08 g sodium dodecyl sulfate (SDS) and 3.5 g glucose were dissolved in 35 ml water and keep stirred for 10min to form a homogeneous solution. Then, transferred the solution into a 60 ml Teflon-lined stainless steel autoclave and hydrothermally treated at 160 °C for 16 h. Second, the puce products were centrifuged and washed with distilled water and absolute ethanol several times. The carbon precursor was obtained after oven-drying at 60 °C for 12 h. Finally, the final CS (Fig. S 5a†) was get after carbonized carbon precursor by heating at 800 °C for 2 h under N<sub>2</sub> flow with a heating rate of 5 °C min<sup>-1</sup> in a tube furnace.

Equally, the mesoporous carbon (MC) were prepared as previously reported.<sup>2</sup> 0.1 mol ferric nitrate (Fe(NO<sub>3</sub>)<sub>3</sub>) and 0.2 mol citric acid were added to 100mL deionized water and stired strongly for 30 min to make sure to form a homogeneous solution. The sol heated at 120 °C in the oven for 24 h, a gel with hierarchical structure was shaped and then calcined at 800 °C at a heating rate of 5 °C min<sup>-1</sup> under N<sub>2</sub> atmosphere for 2 h. The grey powder was then neutralized in 1 M H<sub>2</sub>SO<sub>4</sub> to thoroughly etch away the decomposition products decomposed from Fe(NO<sub>3</sub>)<sub>2</sub>. The final MC (Fig. S 5b†) product was collected after filtration, repeated washing with deionized water and vacuum drying.

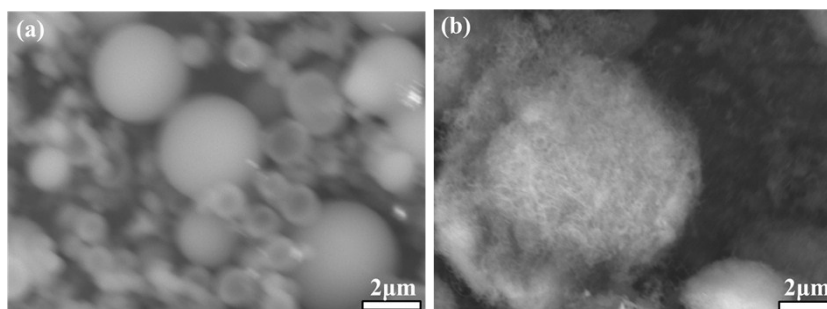

Fig. S5: SEM of (a) CS and (b) MF.

The CS/S composite, MC/S composite and the corrsponding NCF-C/S cathodes were the same to the CNTs/S composite and NCF-CNTs/S cathode, respectively.

| Samples                | Density (kg/m <sup>3</sup> ) | Fiber diameter | Mesh diameter | Main application        |
|------------------------|------------------------------|----------------|---------------|-------------------------|
| Nano-foam              | 6.5-8.5                      | Dozens of nm   | Dozens of nm  | Cleaning supplies       |
| High density nano-foam | 15-17                        | Dozens of nm   | Dozens of nm  | Cleaning supplies       |
| Common Foam            | 4-12                         | ~5μm           | 10-30μm       | Automobile or cosmetics |
| This work              | ~8                           | ~5μm           | 10-30μm       | Construction industry   |

**Table S1.** Physical properties and mainly applications of some others PU foam precursor

| Samples                                 | Sulfur loading<br>(mg/cm <sup>2</sup> ) | Rate<br>(C) | Specific capacity<br>(mAh/g) | EV<br>(kWh/L) | reference |
|-----------------------------------------|-----------------------------------------|-------------|------------------------------|---------------|-----------|
| 3D CNT/graphene/sulfur<br>hybrid sponge | 1.0                                     | 0.5         | 1150                         | 2.93          | 3         |
| 3D few-layer graphene foam              | 2.0                                     | 0.5         | 800                          | 4.08          | 4         |
| Nano-cellular carbon                    | 2.2                                     | 0.5         | 1200                         | 5.25          | 5         |
| Pie-like electrode                      | 3.6                                     | 0.5         | 800                          | 5.7           | 6         |
| Flexible all-carbon electrode           | 2.3                                     | 0.5         | 1000                         | 5.85          | 7         |
| Hollow carbon nanofibers                | 3.5                                     | 0.5         | 900                          | 6.27          | 8         |
| 3D biomass derived active<br>carbon     | 5.1                                     | 0.5         | 950                          | 9.64          | 9         |
| Carbon paper                            | 6.7                                     | 0.5         | 800                          | 10.66         | 10        |
| This work                               | 1.2                                     | 0.5         | 1124                         | 5.37          |           |
|                                         | 1.8                                     | 0.5         | 1012                         | 7.52          |           |

**Table S2.** The specific volumetric energy density of 3D electrodes

| Cycles | R1   | CPE1-T  | CPE1-P | R2    | CPE2-T | CPE2-P | R3    | W1-R  | W1-T | W1-P |
|--------|------|---------|--------|-------|--------|--------|-------|-------|------|------|
| 1      | 6.04 | 9.84e-6 | 0.84   | 31.56 | 0.11   | 0.18   | 35.54 | 8.95  | 3.26 | 0.31 |
| 2      | 5.73 | 1.22e-5 | 0.81   | 25.22 | 0.06   | 0.15   | 30.11 | 10.03 | 3.10 | 0.37 |
| 10     | 5.27 | 1.21e-5 | 0.85   | 17.45 | 0.05   | 0.14   | 29.36 | 12.38 | 2.91 | 0.31 |
| 20     | 5.24 | 1.32e-5 | 0.80   | 55.70 | 0.03   | 0.52   | 27.67 | 14.14 | 4.6  | 0.44 |
| 50     | 6.29 | 1.05e-5 | 0.83   | 58.98 | 0.06   | 0.21   | 37.80 | 12.64 | 0.95 | 0.35 |
| 100    | 4.32 | 1.28e-5 | 0.79   | 67.23 | 0.02   | 0.69   | 56.50 | 23.49 | 0.33 | 0.44 |

**Table S3.** Fitted values of the impedance spectra in Fig. 6c.

- 1 Y. Qu, Z. Zhang, X. Wang, Y. Lai, Y. Liu and J. Li, *J. Mater. Chem. A*, 2013, **1**, 14306-14310.
- 2 X. Tao, X. Chen, Y. Xia, Hui Huang, Y. Gan, R. Wu, F. Chen and W. zhang, *J. Mater. Chem. A*, 2013, **1**, 3295-3301.
- 3 J. He, Y. Chen, P. Li, F. Fu, Z. Wang and W. Zhang, *J. Mater. Chem. A*, 2015, **3**, 18605-18610.
- 4 K. Xi, P. R. Kidambi, R. Chen, C. Gao, X. Peng, C. Ducati, S. Hofmann and R. V. Kumar, *Nanoscale*, 2014, **6**, 5746-5753.
- 5 S.-H. Chung and A. Manthiram, *J. Mater. Chem. A*, 2013, **1**, 9590-9596.
- 6 Z. Li, J. T. Zhang, Y. M. Chen, J. Li and X. W. Lou, *Nat. Commun.*, 2015, **6**, 8850-8857.
- 7 J.-Q. Huang, H.-J. Peng, X.-Y. Liu, J.-Q. Nie, X.-B. Cheng, Q. Zhang and F. Wei, *Journal of Materials Chemistry A*, 2014, **2**, 10869-10875.
- 8 Z. Li, J. Zhang and X. W. Lou, *Angew. Chem. Int. Ed. Engl.*, 2015, **54**, 12886-12890.
- 9 J. Zhang, J. Xiang, Z. Dong, Y. Liu, Y. Wu, C. Xu and G. Du, *Electrochim. Acta*, 2014, **116**, 146-151.
- 10 J. Yan, X. Liu, H. Qi, W. Li, Y. Zhou, M. Yao and B. Li, *Chem. Mater.*, 2015, **27**, 6394-6401.
